# Supplementary material for: Epigallocatechin-3-gallate pretreatment alleviates doxorubicin-induced ferroptosis and cardiotoxicity by upregulating AMPKα2 and activating adaptive autophagy
Source: PubMed Central journal article supplement — Redox Biol. 2021 Nov 11;48:102185. doi: 10.1016/j.redox.2021.102185 (PMC8600154; doi:10.1016/j.redox.2021.102185), 2021-11-11

## Figure 1G

### Test 1

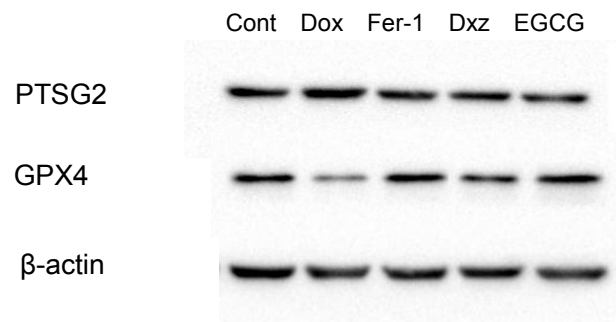

### Test 2

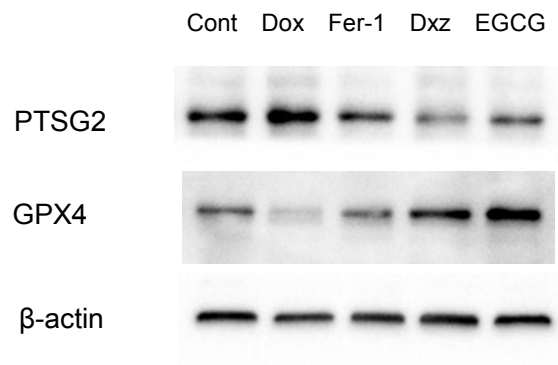

### Test 3

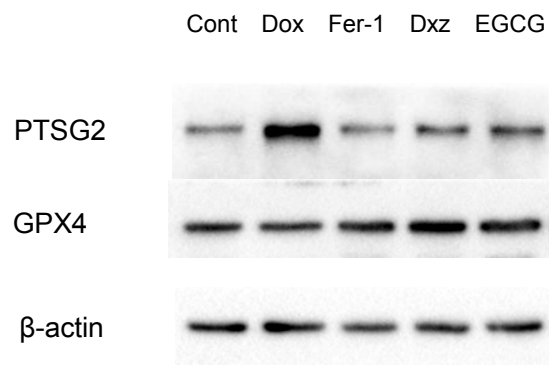

## Figure 1H

### Test 1

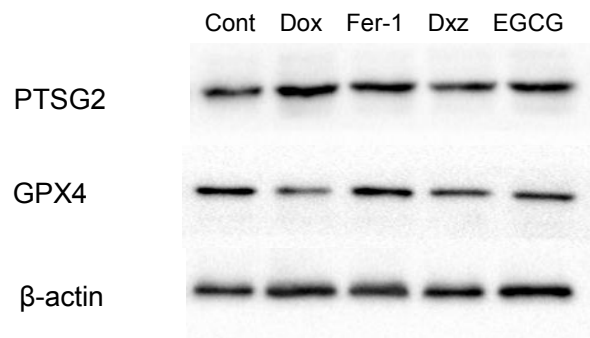

### Test 2

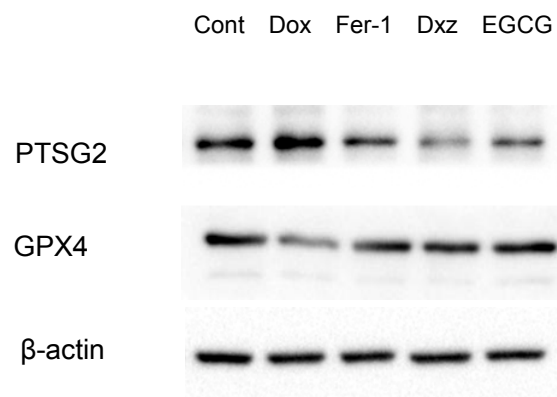

### Test 3

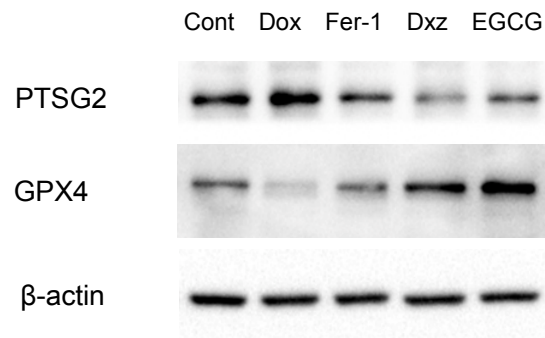

## Figure 1J

### Test 1

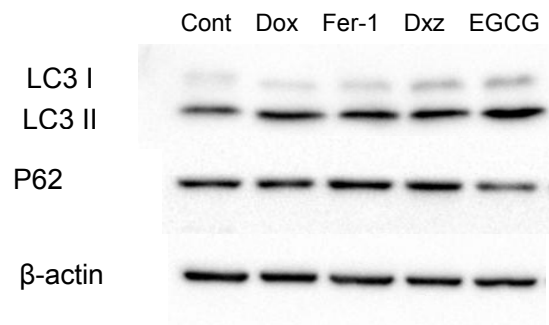

### Test 2

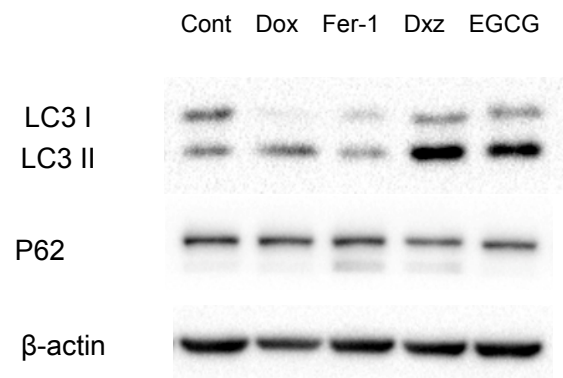

### Test 3

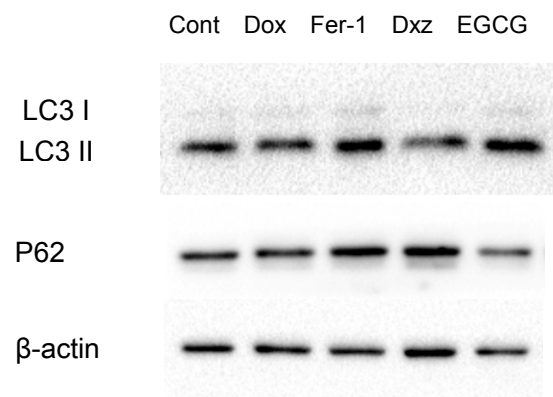

## Figure 1K

### Test 1

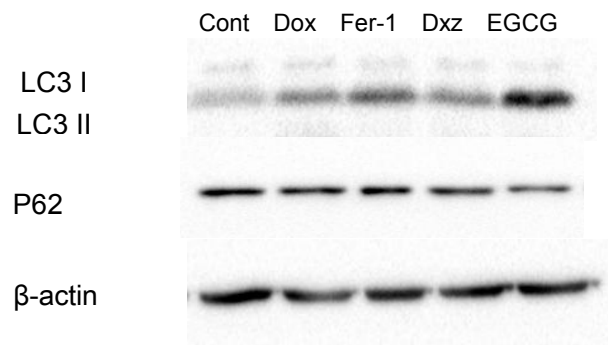

### Test 2

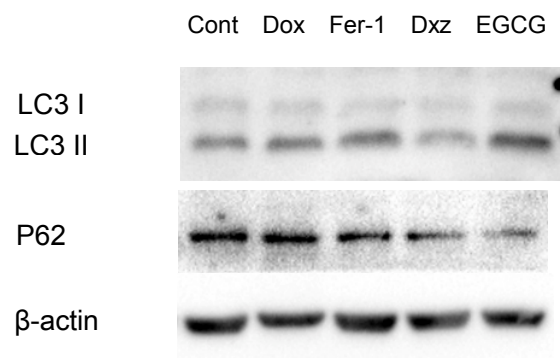

### Test 3

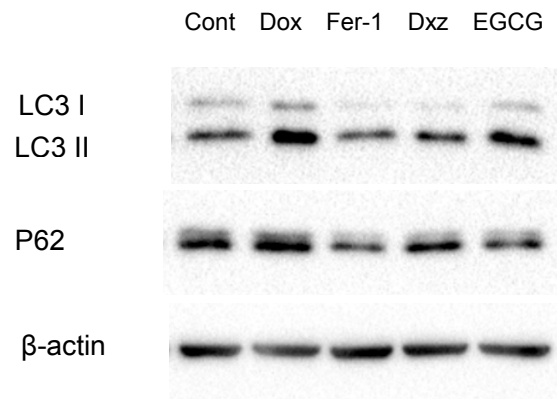

## Figure 2A

### Test 1

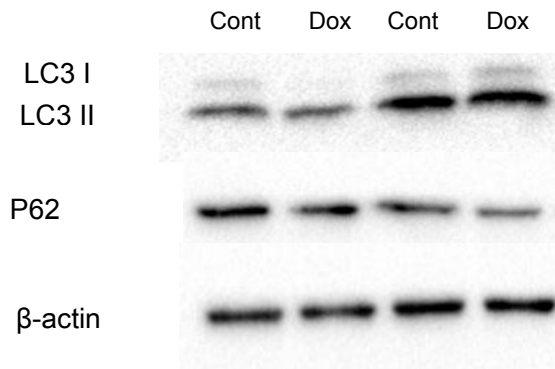

### Test 2

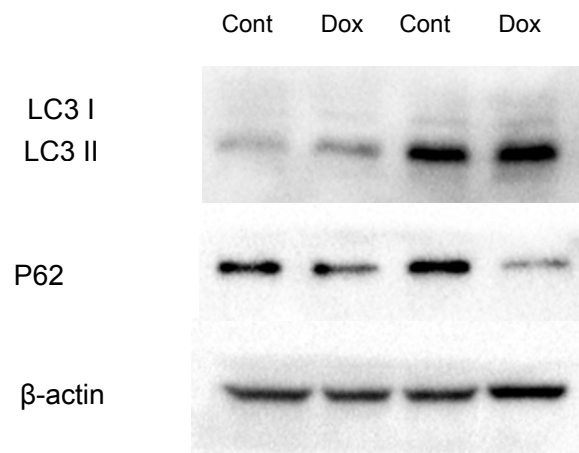

### Test 3

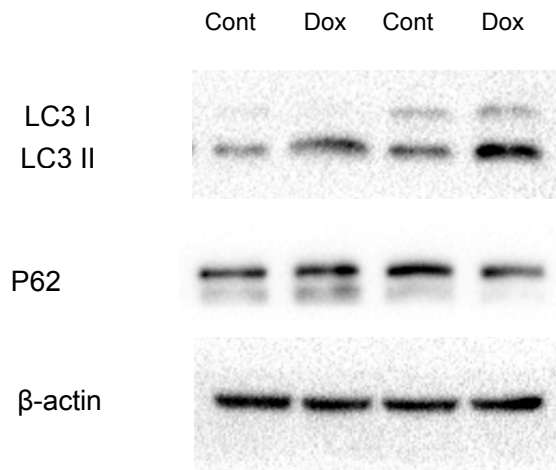

## Figure 2B

### Test 1

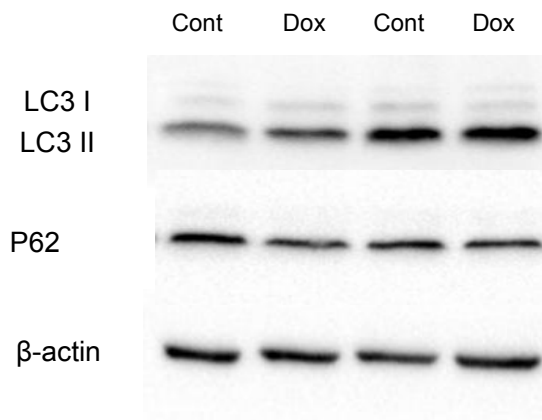

### Test 2

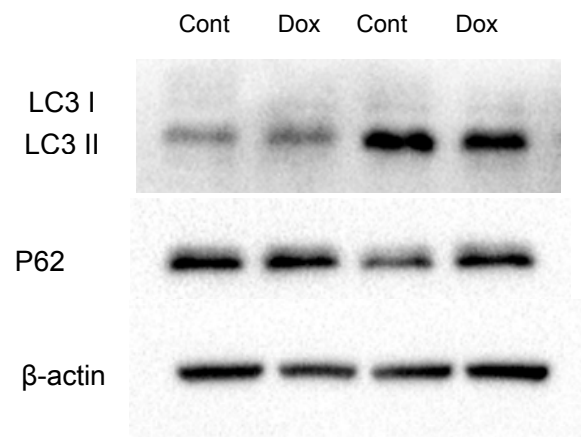

### Test 3

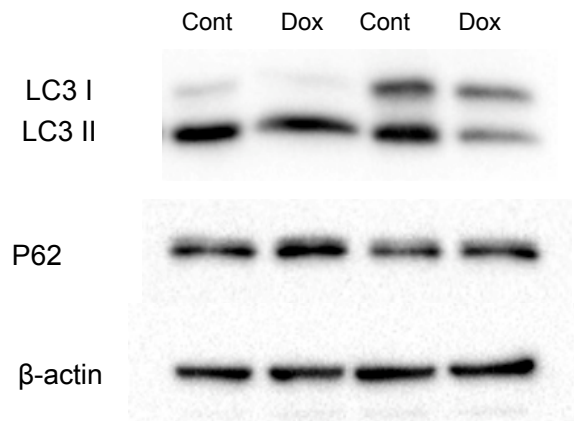

## Figure 2C

### Test 1

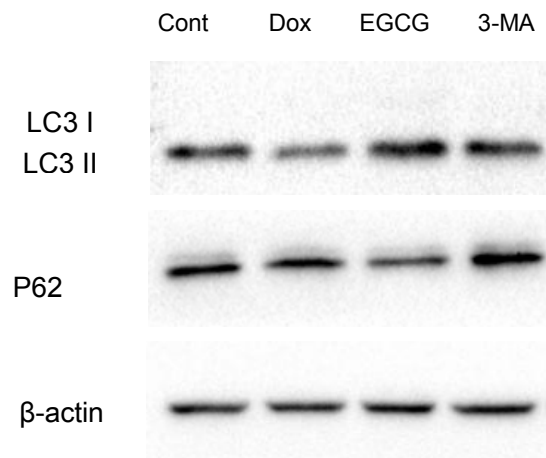

### Test 2

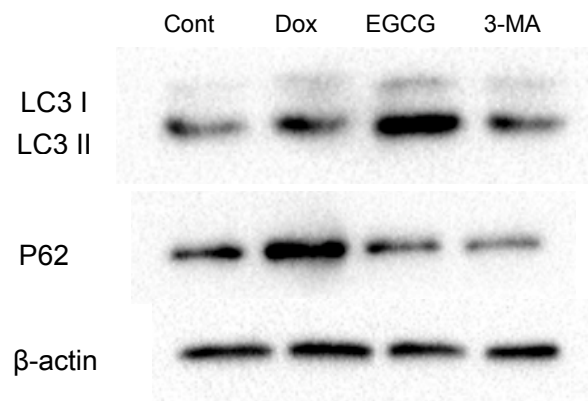

### Test 3

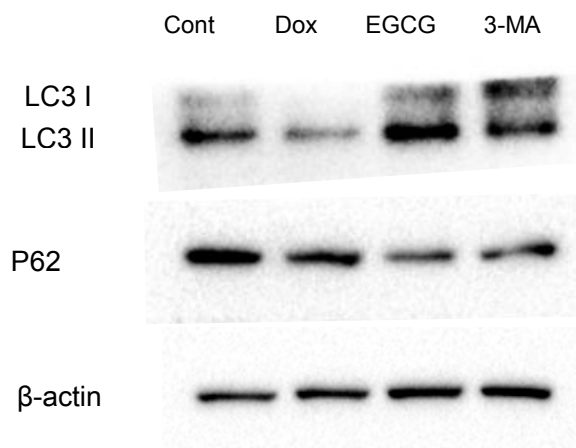

**Figure 2D**

**Test 1**

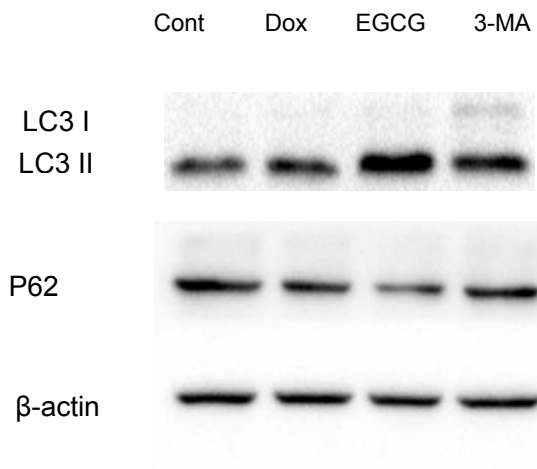

**Test 2**

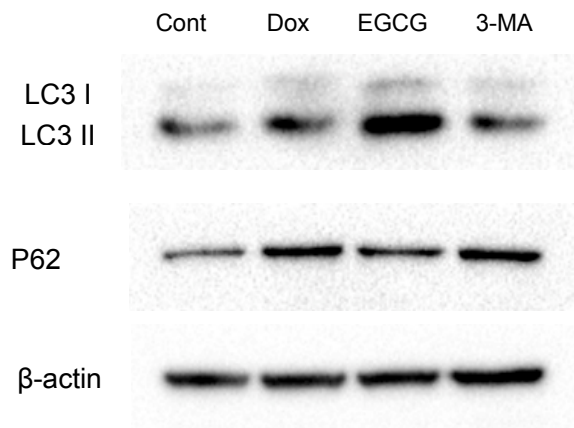

**Test 3**

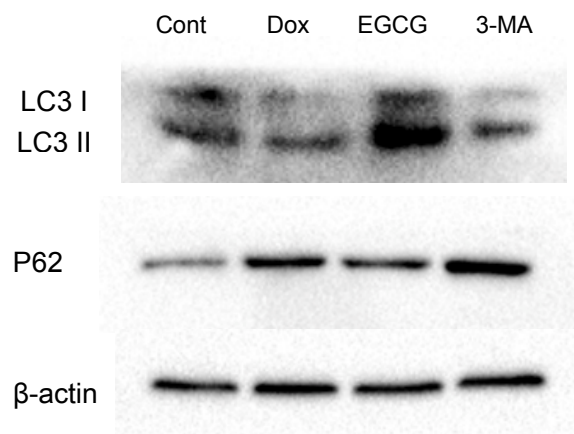



**Figure 3A**

**Test 1**

Cont Dox EGCG CC

p-AMPK

AMPK

p-mTOR

mTOR

p-ULK1

ULK1

p-ACC

ACC

GAPDH

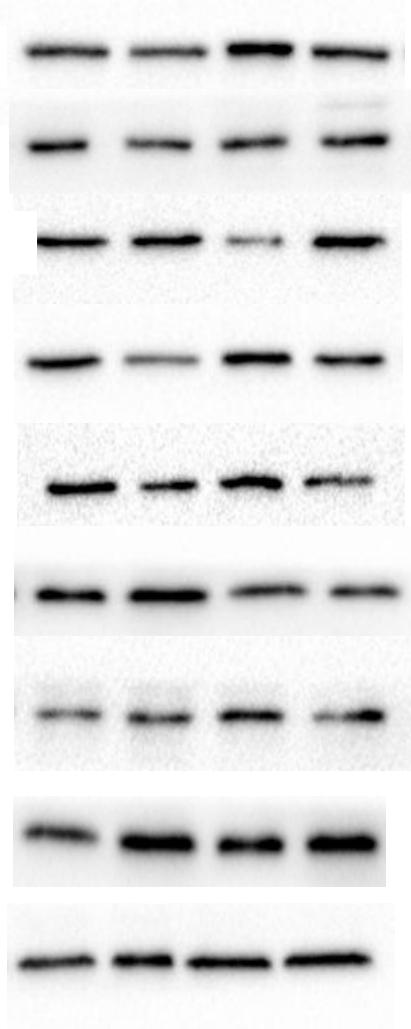

**Test 2**

Cont Dox EGCG CC

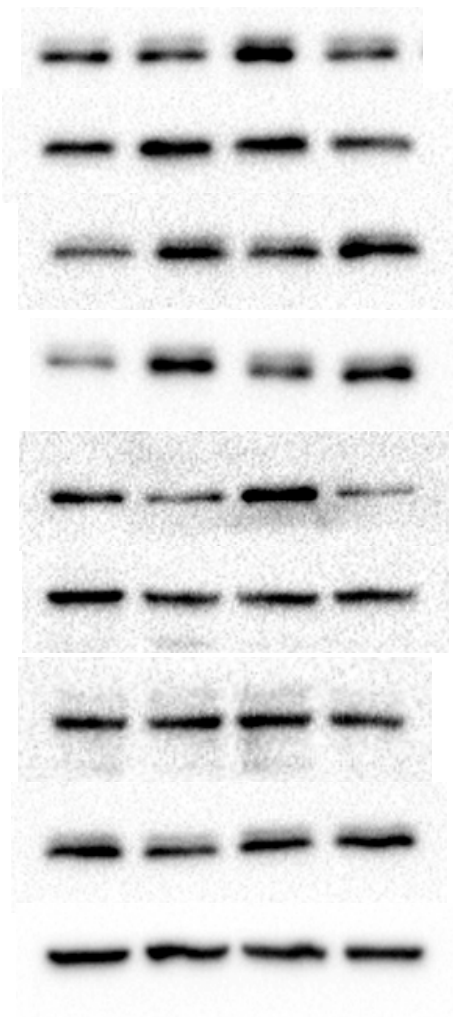

**Test 3**

Cont Dox EGCG CC

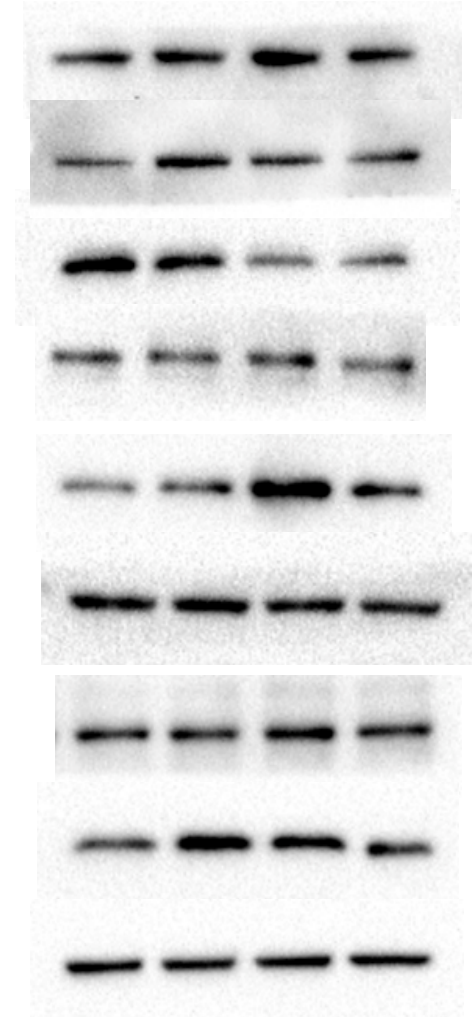

**Figure 3C**

**Test 1**

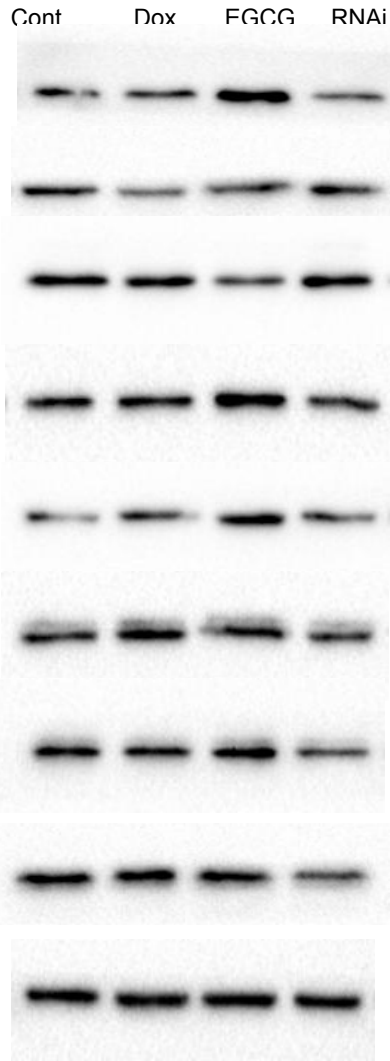

**Test 2**

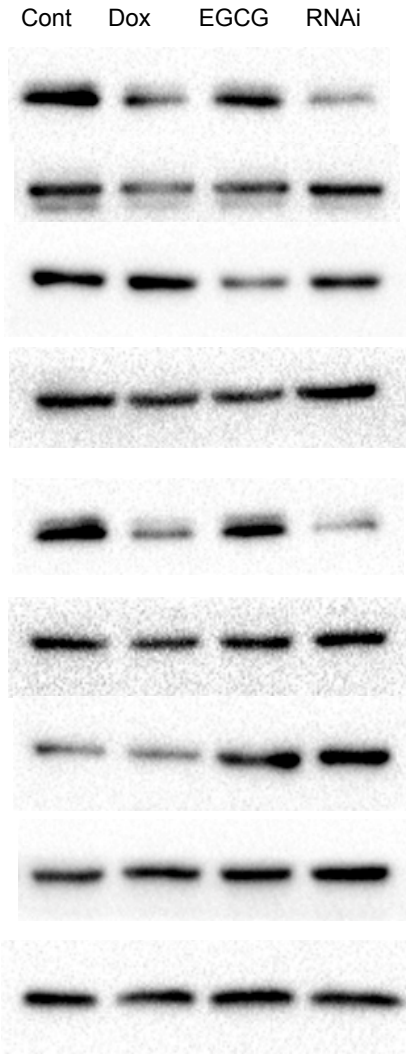

**Test 3**

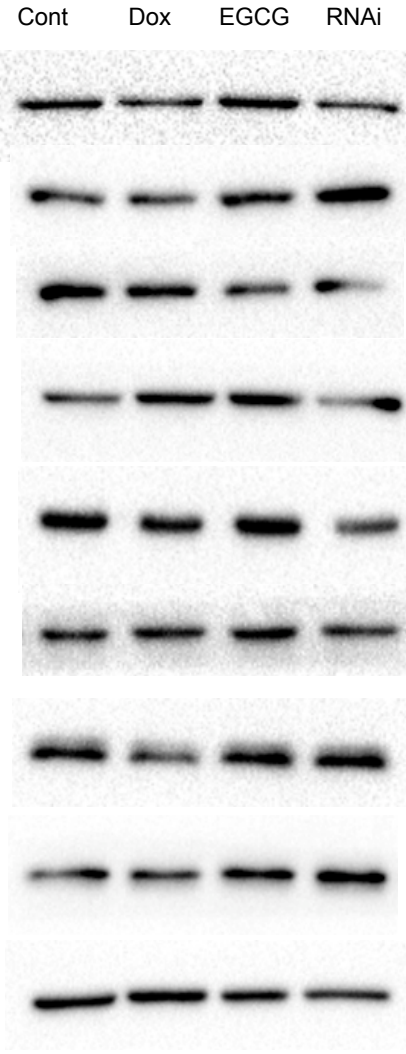

**Figure 5C**

**Test 1**

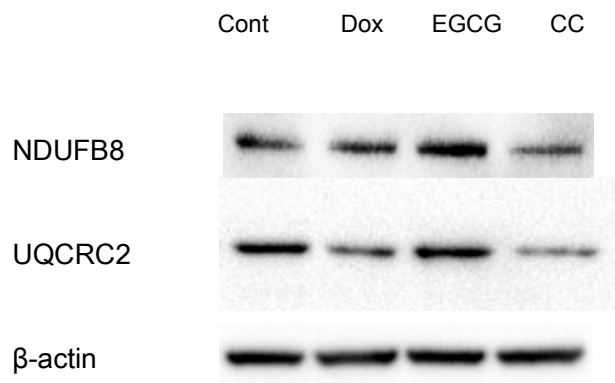

**Test 2**

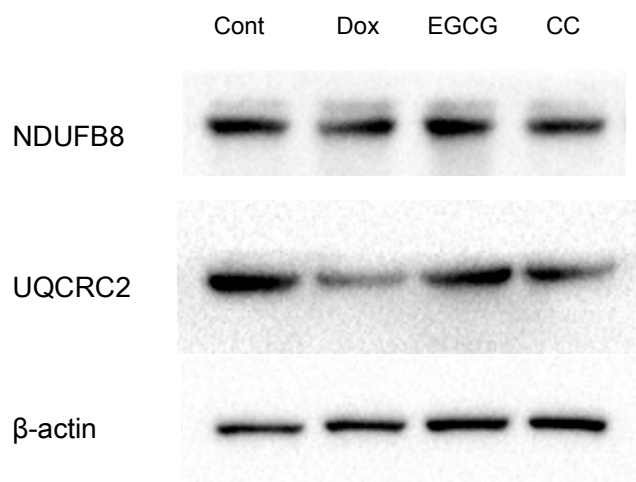

**Test 3**

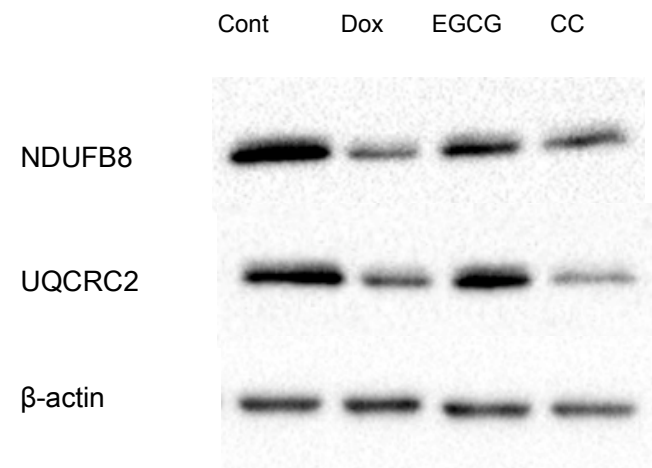

**Figure 6I**

**Test 1**

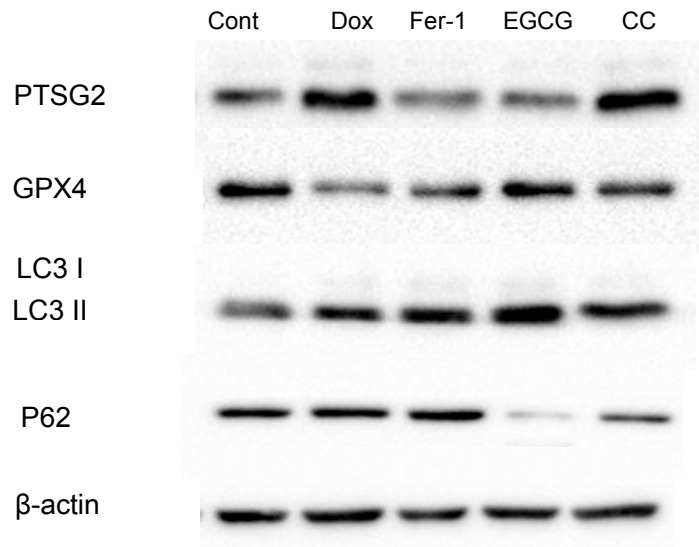

**Test 2**

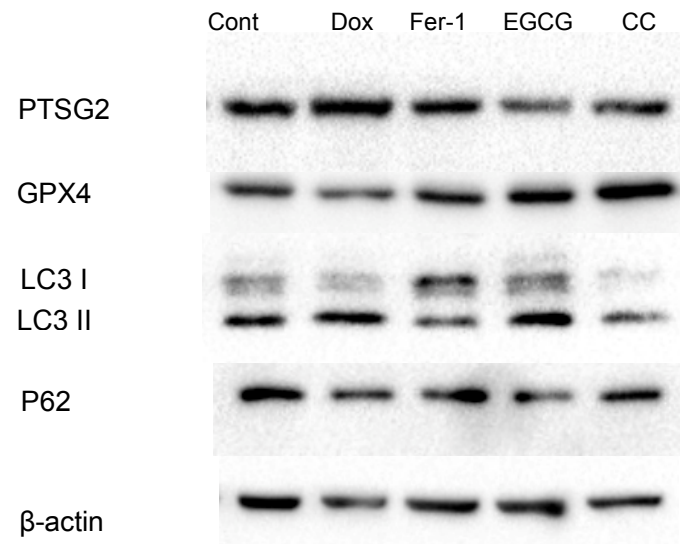

**Test 3**

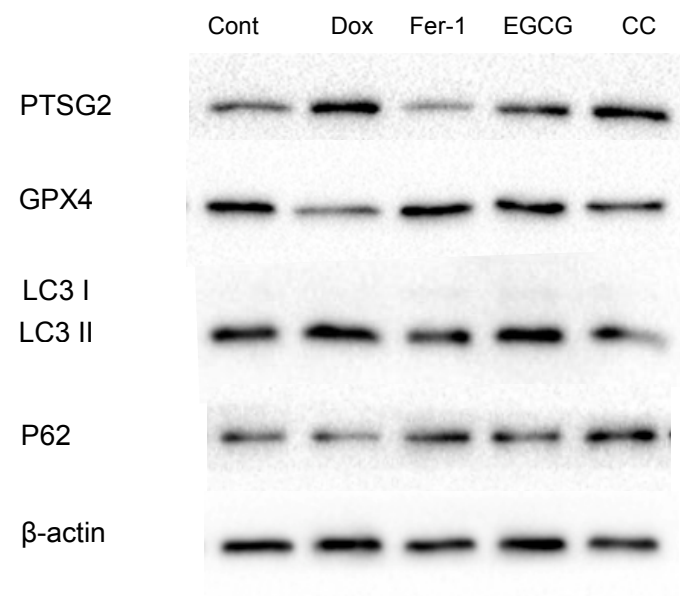

**Figure 7A**

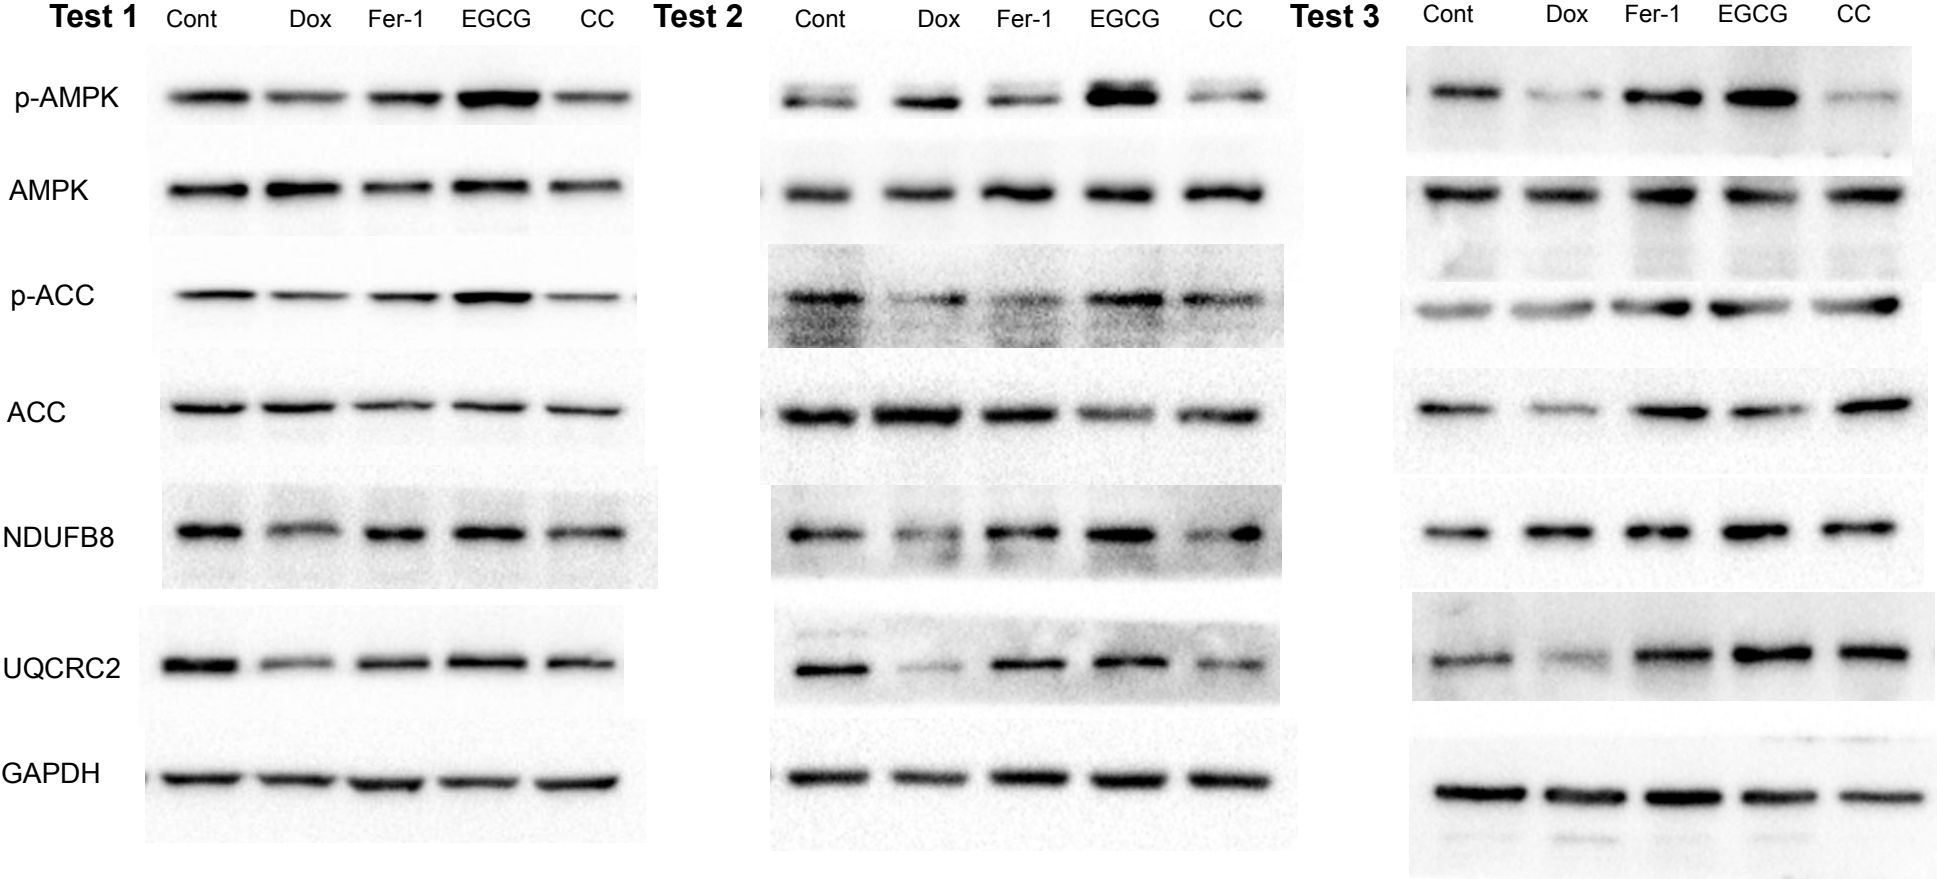

Supplement: mmc1.pdf [file mmc1.pdf]
